# Supplementary material
Source: Springer Nature journal article supplement (https://www.springermedizin.de/resource/supplementary/12959_2013_198_MOESM2_ESM.pdf/9569252)

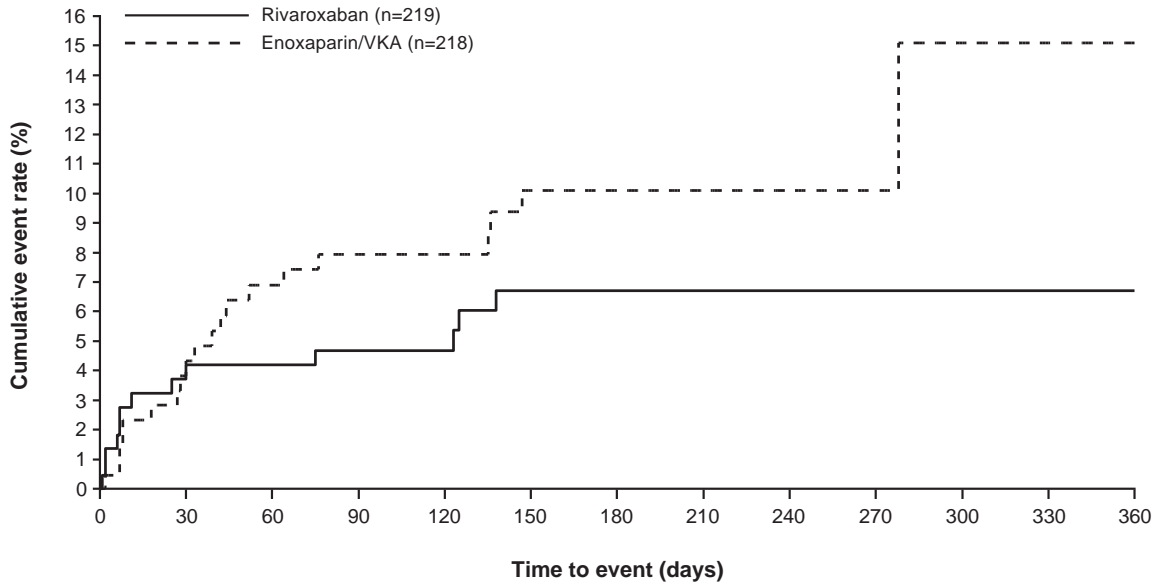

Number of patients at risk

|                |     |     |     |     |     |     |    |    |    |    |    |    |   |
|----------------|-----|-----|-----|-----|-----|-----|----|----|----|----|----|----|---|
| Rivaroxaban    | 219 | 200 | 194 | 169 | 143 | 138 | 78 | 27 | 27 | 21 | 15 | 14 | 9 |
| Enoxaparin/VKA | 218 | 192 | 180 | 151 | 131 | 125 | 83 | 24 | 20 | 20 | 15 | 13 | 8 |

Supplement: MOESM2 [file 9569252]
